# Supplementary material
Source: HighWire-hosted journal article supplement (https://www.cmajopen.ca/highwire/filestream/81036/field_highwire_adjunct_files/2/open-2016-0012-reviewer-comments.pdf)
Supplement: open-2016-0012-reviewer-comments.pdf [file open-2016-0012-reviewer-comments.pdf]

| Article details: 2016-0012                 |                                                                                                                                                                                                                                                                                                                                                                                                                                                                                                                                                                                                                                                                                                                        |
|--------------------------------------------|------------------------------------------------------------------------------------------------------------------------------------------------------------------------------------------------------------------------------------------------------------------------------------------------------------------------------------------------------------------------------------------------------------------------------------------------------------------------------------------------------------------------------------------------------------------------------------------------------------------------------------------------------------------------------------------------------------------------|
| Title                                      | A cross-sectional survey to assess the knowledge, attitude, willingness, and readiness of primary health care providers of Niagara region, Ontario, to provide oral health services to children                                                                                                                                                                                                                                                                                                                                                                                                                                                                                                                        |
| Authors                                    | Sonica Singhal BDS PhD, Rafael Figueiredo DDS MSc, Sandy Dupuis BSc MSc, Rachel Skellet BPh MSc, Tara Wincott BA, Carolyn Dyer BKin MA, Andrea Feller MD, Carlos Quiñonez DMD PhD                                                                                                                                                                                                                                                                                                                                                                                                                                                                                                                                      |
| Reviewer 1                                 | Dr. Hasanain Ghazi                                                                                                                                                                                                                                                                                                                                                                                                                                                                                                                                                                                                                                                                                                     |
| Institution                                | Management and Science University, Community Medicine, International Medical School, Malaysia                                                                                                                                                                                                                                                                                                                                                                                                                                                                                                                                                                                                                          |
| General comments (author response in bold) | <p>Introduction too long, need to summarize</p> <p>In Methods, "A modified Dillman approach was used..." Why?</p> <p>In Data Analysis, you should explain the questionnaires, how the knowledge was measured</p> <p>In Discussion, 1<sup>st</sup> line, there is no need to repeat the aim of the study</p> <p>In Conclusion, please summarize; it is too long</p> <p>Tables 1 and 3 are unnecessary; delete</p> <p>Table 4, column 2: why only 2 options, what if they don't agree?</p> <p><b>Thank you Dr. Hasnain Faisal Ghazi for reviewing our manuscript and providing us your feedback. Most of the comments made in the PDF file have been noted by the editor as well. We have addressed the comments</b></p> |
| Reviewer 2                                 | Dr. Murray Finkelstein                                                                                                                                                                                                                                                                                                                                                                                                                                                                                                                                                                                                                                                                                                 |
| Institution                                | Mt Sinai Hospital, Department of Family and Community Medicine                                                                                                                                                                                                                                                                                                                                                                                                                                                                                                                                                                                                                                                         |
| General comments (author response in bold) | <p>As a Family Physician I enjoyed reading your manuscript. I have little knowledge about pediatric dentistry and found your paper to be well written, educational, and to spike my interest to learn more. I would urge you to prepare a paper, aimed at the education of primary care providers about children's oral health, for a journal such as CMAJ or the Canadian Family Physician or a Canadian pediatrics journal.</p> <p>I found your methods and analysis to be appropriate.</p>                                                                                                                                                                                                                          |
